# Supplementary material for: Hetero-antagonism of avibactam and sulbactam with cefiderocol in carbapenem-resistant Acinetobacter spp
Source: PubMed Central journal article supplement (PMC11448186; doi:10.1128/spectrum.00930-24), 2024-08-20
Supplement: spectrum.00930-24-s0001.pdf [file spectrum.00930-24-s0001.pdf]

## Supplementary Material Legends

**Figure S1.** Effect of  $\beta$ -lactamase inhibitors sulbactam (SUL) for AMA22\_1 (A) and avibactam (AVI) for AMA23 (B) on the antimicrobial susceptibility to cefiderocol. Minimum inhibitory concentration (MIC) on cation adjusted Mueller-Hinton agar supplemented with 1 to 16  $\mu\text{g/mL}$  SUL or AVI was performed following manufacturer's recommendations (Liofilchem S.r.l., Italy).

**Figure S2.** Expression of genes coding for the two-component regulatory system BfmRS in the AMA23, AMA23\_4R, and AMA23\_8R strains. The data shown of qRT-PCR are mean  $\pm$  SD. Fold changes were calculated using double  $\Delta\text{Ct}$  analysis. At least three independent biological samples were tested using four technical replicates. Statistical significance ( $p < 0.05$ ) was determined by two-way ANOVA followed by Tukey's multiple comparison test. Significance was indicated by: \*  $p < 0.05$ , \*\*  $p < 0.01$ , \*\*\*  $p < 0.001$  and \*\*\*\*  $p < 0.0001$ .

**Table S1.** Primers used for the transcriptional analysis of this work.

**Table S2.** Antimicrobial susceptibility of the wild-type and the hetero-resistant selected strains.

**Table S3.** Antimicrobial susceptibility of the CRAB AMA23 and the heteroresistant variants, performed using e-strips on Mueller Hinton Agar.

**Table S4.** Mutational analysis of AMA22\_1R compared to the parental strain.

**Table S5.** Mutational analysis of AMA23\_4R, and AMA23\_8R compared to the parental strain.

**Table S6.** Comparison of the level of expression of genes obtained by qRT-PCR in the AMA22 and AMA23 variants compared to the corresponding wild-type strains using double  $\Delta C_t$  analysis.

**A)**

AMA22  
CAMHA  
+SUL(1ug/ml)

AMA22  
CAMHA  
+SUL(2ug/ml)

AMA22  
CAMHA  
+SUL(4ug/ml)

AMA22  
CAMHA  
+SUL(8ug/ml)

AMA22  
CAMHA  
+SUL(16ug/ml)

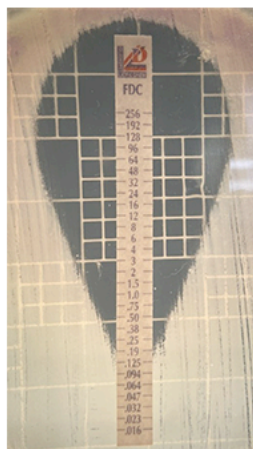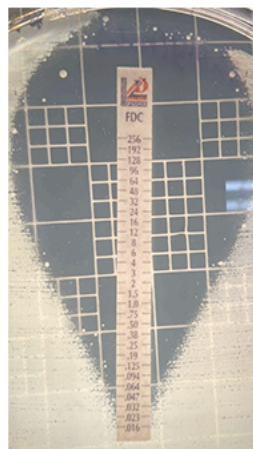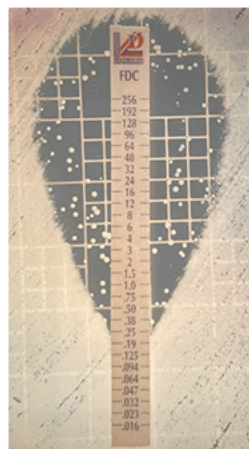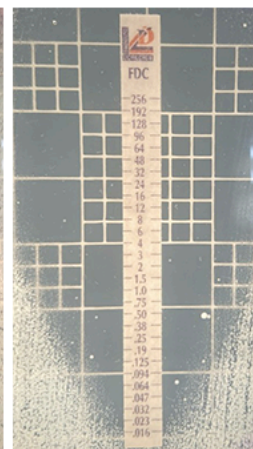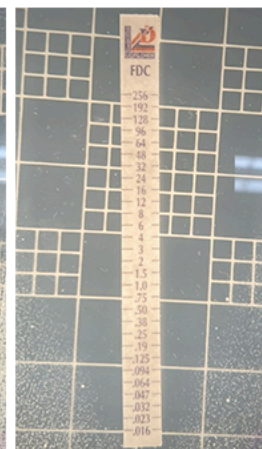**B)**

AMA23  
CAMHA  
+AVI(1ug/ml)

AMA23  
CAMHA  
+AVI(2ug/ml)

AMA23  
CAMHA  
+AVI(4ug/ml)

AMA23  
CAMHA  
+AVI(8ug/ml)

AMA23  
CAMHA  
+AVI(16ug/ml)

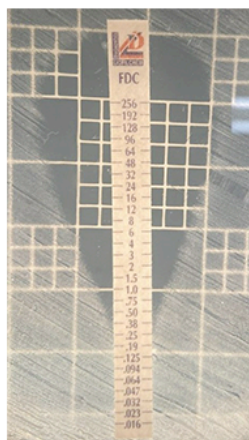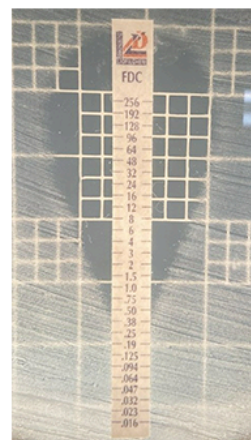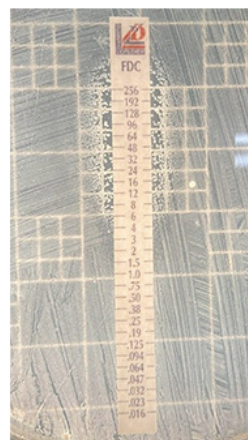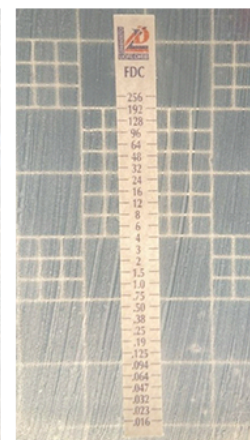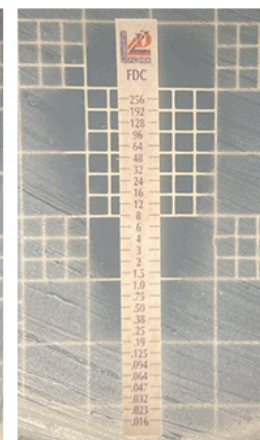

# *bfmSR*

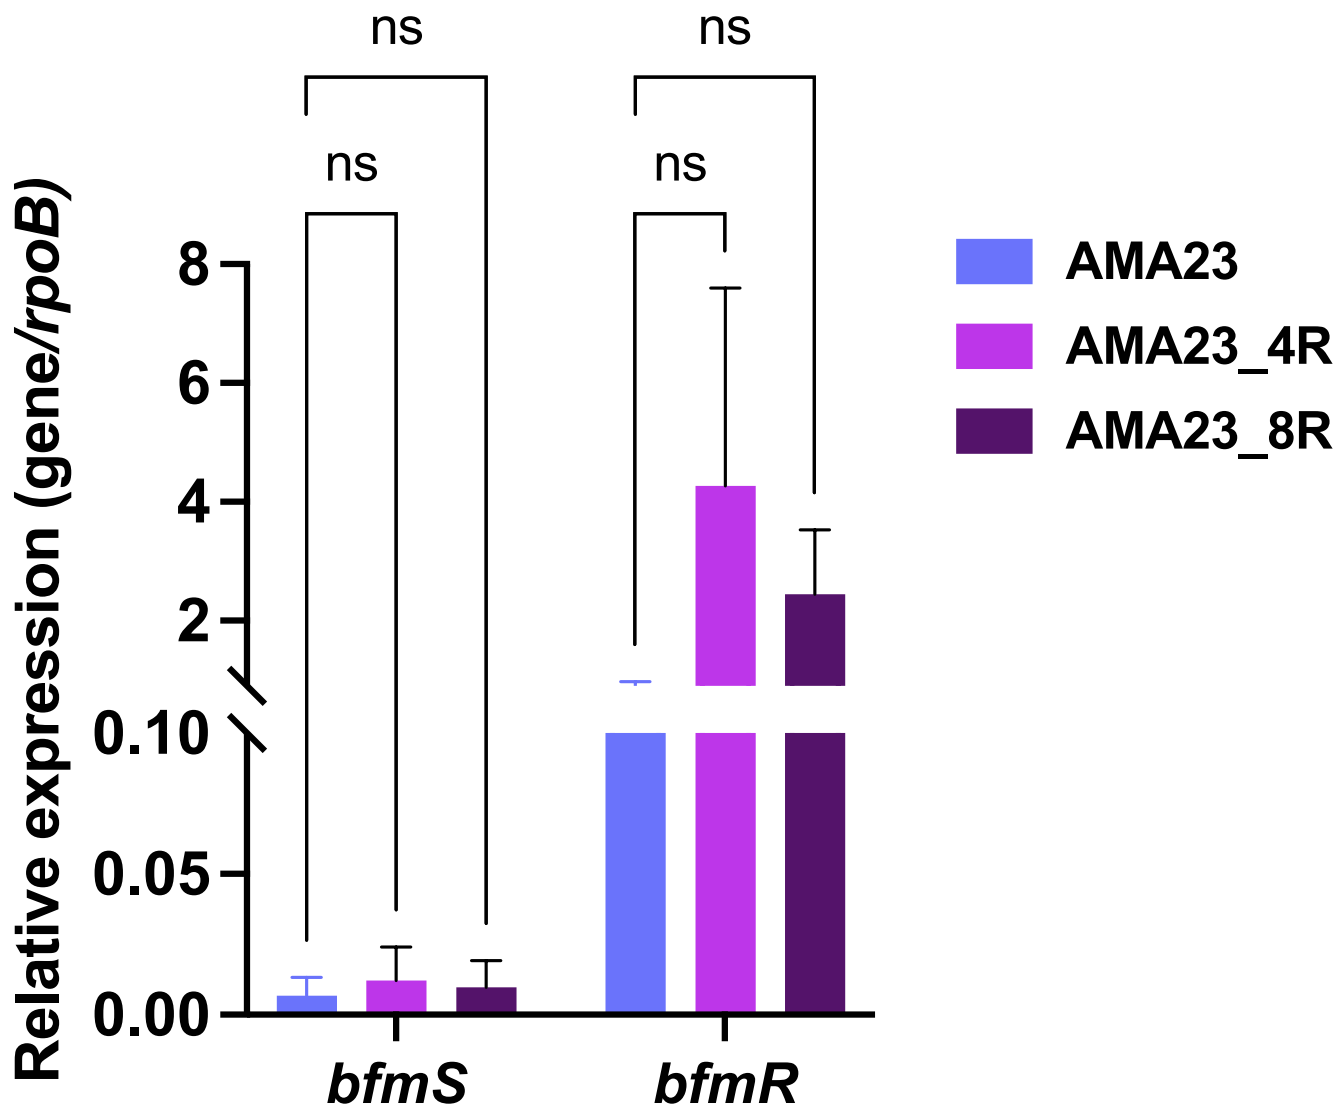

**Table S1:** List of primers used in the study to perform RT-qPCR

| Primer name | 5'-sequence-3'           |
|-------------|--------------------------|
| ompA-F      | TCTTGGTGGTCACTTGAAGC     |
| ompA-R      | ACTCTTGTGGTTGTGGAGCA     |
| carO-F      | GCGGATGAAGCTGTTGTTCC     |
| carO-R      | GCCATAACAAAGCACCACCG     |
| pirA-F      | GTCTATGGCTTTTGCTGCACA    |
| pirA-R      | GCGATTGCTTCACTTGCTCT     |
| bauA-F      | AAATGTTTGGCCGCGTTGAGGT   |
| bauA-R      | CAATCGTGCAAACGGTTCATCAGC |
| piuA-F      | TTGGTGACCTCGCTCAATG      |
| piuA-R      | AGTCTGGGCGTGCTTGTAAG     |
| ppiA-F      | CGATGATAAAGCACCAATGAGTGT |
| ppiA-R      | TCGCCAAAGTACCTCGTGTA     |
| baeS-F      | GGTCTTGCTTACCACGCTGT     |
| baeS-R      | AATCATCTGGTGCTGCCGTT     |
| baeR-F      | AGTCGAGTTAGCGCATCTGG     |
| baeR-F      | TCTTCAGTACGTGCCGTAC      |
| blaADC-F    | TGCCAACCTTAACCCACA       |
| blaADC-R    | AGTTTGTAACGTTGCCGG       |
| blaNDM-1-F  | GAAGCTGAGCACCGCATTAG     |
| blaNDM-1-R  | AACCAGATCGCCAAACCGTT     |
| pbp3-F      | AGCGAACAAGCAAACACGA      |
| pbp3-R      | GCCCAGAGCAGATAAAACCG     |

**Table S2:** Antimicrobial susceptibility of the CRAB AMA22, AMA23 and the heteroresistant variants, performed using disk diffusion (Liofilchem S.r.l., Italy) on Mueller Hinton Agar.

| Disk                       | AMA22_1 | AMA22_1R | AMA23 | AMA23_4R | AMA23_8R |
|----------------------------|---------|----------|-------|----------|----------|
| Cefiderocol (FDC) 30ug     | 20      | 20       | 34    | 32       | 33       |
| Imipenem (IMI) 10ug        | 12      | 13       | 21    | 17       | 18       |
| Meropenem (MRP) 10ug       | 7       | 7        | 16    | 15       | 13       |
| Ceftazidime (CAZ) 30ug     | 6       | 6        | 6     | 6        | 6        |
| Amikacin (AN) 30ug         | 22      | 24       | 25    | 30       | 28       |
| Ceftriaxone (CRO) 30ug     | 6       | 6        | 13    | 15       | 15       |
| Gentamicin (GM) 10ug       | 28      | 29       | 40    | 41       | 41       |
| Ciprofloxacin (CIP) 5ug    | 33      | 31       | 43    | 44       | 44       |
| Ampicillin (AMP) 10ug      | 6       | 6        | 13    | 18       | 17       |
| Ceftazidime-AVI (CZA) 14ug | 7       | 7        | 33    | 32       | 32       |
| Ampicillin-SUL (AMS) 20ug  | 9       | 10       | 32    | 33       | 32       |

**Table S3.** Antimicrobial susceptibility of the CRAB AMA23 and the heteroresistant variants, performed using e-strips on Mueller Hinton Agar.

| Strain   | Amikacin (mg/L) | Ampicillin (mg/L) |
|----------|-----------------|-------------------|
| AMA23    | 24              | >256              |
| AMA23_4R | 1.5             | 96                |
| AMA23_8R | 1.5             | 96                |

**Table S4.** Mutational analysis of AMA22\_1R compared to the parental strain.

| Predicted mutations of AMA22_1 intrahalo colonies |          |                            |                                       |                                                             |
|---------------------------------------------------|----------|----------------------------|---------------------------------------|-------------------------------------------------------------|
| position                                          | mutation | annotation                 | gene                                  | description                                                 |
| 658418                                            | +50 bp   | noncoding (73/74 nt)       | <i>AMA22N_00629</i> ←                 | tRNA-Asp                                                    |
| 2039680                                           | Δ2 bp    | coding (665-666/1110 nt)   | <i>AMA22N_01993</i> →                 | hypothetical protein                                        |
| 2205235                                           | A→C      | I308L (ATT→CTT)            | <i>AMA22N_02150</i> →                 | hypothetical protein                                        |
| 2205280                                           | G→C      | A323P (GCT→CCT)            | <i>AMA22N_02150</i> →                 | hypothetical protein                                        |
| 3208944                                           | Δ1 bp    | noncoding (1/77 nt)        | <i>AMA22N_03103</i> →                 | tRNA-Pro                                                    |
| 3469078                                           | 2 bp→A   | coding (1604-1605/3159 nt) | <i>czcA_2</i> →                       | Cobalt-zinc-cadmium resistance protein CzcA                 |
| 3940075                                           | A→T      | intergenic (+65/-29)       | <i>acul</i> → / → <i>AMA22N_03871</i> | Acrylyl-CoA reductase AcuI/IS256 family transposase ISAbA26 |
| 3940077                                           | T→A      | intergenic (+67/-27)       | <i>acul</i> → / → <i>AMA22N_03871</i> | Acrylyl-CoA reductase AcuI/IS256 family transposase ISAbA26 |
| 3940087                                           | A→T      | intergenic (+77/-17)       | <i>acul</i> → / → <i>AMA22N_03871</i> | Acrylyl-CoA reductase AcuI/IS256 family transposase ISAbA26 |
| 3940089                                           | A→C      | intergenic (+79/-15)       | <i>acul</i> → / → <i>AMA22N_03871</i> | Acrylyl-CoA reductase AcuI/IS256 family transposase ISAbA26 |
| 3940092                                           | G→A      | intergenic (+82/-12)       | <i>acul</i> → / → <i>AMA22N_03871</i> | Acrylyl-CoA reductase AcuI/IS256 family transposase ISAbA26 |
| 3940107                                           | T→G      | Y2D (TAT→GAT)              | <i>AMA22N_03871</i> →                 | IS256 family transposase ISAbA26                            |
| 3940115                                           | T→A      | A4A (GCT→GCA)              | <i>AMA22N_03871</i> →                 | IS256 family transposase ISAbA26                            |
| 3940133                                           | A→T      | A10A (GCA→GCT)             | <i>AMA22N_03871</i> →                 | IS256 family transposase ISAbA26                            |
| 3940136                                           | T→C      | A11A (GCT→GCC)             | <i>AMA22N_03871</i> →                 | IS256 family transposase ISAbA26                            |
| 3940142                                           | A→G      | L13L (TTA→TTG)             | <i>AMA22N_03871</i> →                 | IS256 family transposase ISAbA26                            |
| 3940152                                           | T→C      | L17L (TTA→CTA)             | <i>AMA22N_03871</i> →                 | IS256 family transposase ISAbA26                            |
| 3940160                                           | T→A      | T19T (ACT→ACA)             | <i>AMA22N_03871</i> →                 | IS256 family transposase ISAbA26                            |
| 3940163                                           | T→A      | P20P (CCT→CCA)             | <i>AMA22N_03871</i> →                 | IS256 family transposase ISAbA26                            |
| 4042959                                           | A→T      | V8V (GTA→GTT)              | <i>AMA22N_04003</i> →                 | IS3 family transposase ISAbA14                              |

Variant calling was performed using breseq and gdttools software (Parameter: Default)  
Reference sequence: *A. baumannii* AMA22\_1 without beta-lactam inhibitor

**Table S5.** Mutational analysis of AMA23\_4R, and AMA23\_8R compared to the parental strain.

| Predicted mutations of AMA23 intrahalo colonies |             |           |           |                         |                               |                                                                                                    |
|-------------------------------------------------|-------------|-----------|-----------|-------------------------|-------------------------------|----------------------------------------------------------------------------------------------------|
| position                                        | mutation    | AMA23_4 R | AMA23_8 R | annotation              | gene                          | description                                                                                        |
| 161,533                                         | G→C         | 1         | 1         | intergenic (-96/-232)   | AMA23_00159 ← / → AMA23_00160 | hypothetical protein/hypothetical protein                                                          |
| 284,575                                         | C→A         | 1         | 1         | V105V (GTC→GTA)         | AMA23_00272 →                 | IS1 family transposase ISPa14                                                                      |
| 284,581                                         | 2 bp→GT     | 0         | 1         | coding (321-322/702 nt) | AMA23_00272 →                 | IS1 family transposase ISPa14                                                                      |
| 302,195                                         | A→C         | 0         | 1         | intergenic (+284/-537)  | AMA23_00290 → / → mlaA        | hypothetical protein/putative phospholipid-binding lipoprotein MlaA                                |
| 302,197                                         | 2 bp→AT     | 0         | 1         | intergenic (+286/-534)  | AMA23_00290 → / → mlaA        | hypothetical protein/putative phospholipid-binding lipoprotein MlaA                                |
| 317,447                                         | A→G         | 1         | 0         | R215R (AGA→AGG)         | AMA23_00302 →                 | IS4 family transposase ISCja2                                                                      |
| 317,456                                         | G→T         | 1         | 0         | S218S (TCG→TCT)         | AMA23_00302 →                 | IS4 family transposase ISCja2                                                                      |
| 317,483                                         | C→A         | 1         | 1         | P227P (CCC→CCA)         | AMA23_00302 →                 | IS4 family transposase ISCja2                                                                      |
| 317,501                                         | C→T         | 1         | 0         | G233G (GGC→GGT)         | AMA23_00302 →                 | IS4 family transposase ISCja2                                                                      |
| 551,275                                         | 98 bp→47 bp | 0         | 1         | intergenic (-3/+1)      | AMA23_00526 ← / ← AMA23_00527 | tRNA-Asp/tRNA-Asp                                                                                  |
| 1,067,181                                       | Δ100 bp     | 1         | 1         | intergenic (-211/+207)  | AMA23_01038 ← / ← panM        | tRNA-Phe/PanD maturation factor                                                                    |
| 1,206,815                                       | Δ100 bp     | 1         | 1         | intergenic (+1/+387)    | AMA23_01174 → / ← AMA23_01175 | tRNA-Pro/hypothetical protein                                                                      |
| 1,958,397                                       | T→C         | 0         | 1         | intergenic (-567/+174)  | AMA23_01883 ← / ← aphA        | hypothetical protein/Aminoglycoside 3'-phosphotransferase                                          |
| 1,973,646                                       | T→G         | 0         | 1         | A114A (GCA→GCC)         | AMA23_01901 ←                 | IS66 family transposase ISAb25                                                                     |
| 2,089,991                                       | 98 bp→20 bp | 1         | 1         | intergenic (+2/-6)      | AMA23_02006 → / → AMA23_02007 | tRNA-Gln/tRNA-Gln                                                                                  |
| 2,275,902                                       | Δ100 bp     | 1         | 1         | intergenic (+2115/-721) | suhB → / → mlaF               | Inositol-1-monophosphatase/putative phospholipid import ATP-binding protein MlaF                   |
| 2,410,736                                       | G→A         | 1         | 1         | G102D (GGT→GAT)         | bfmR →                        | bfmR/bfmS system is a bacterial two-component regulatory system consisting of the membrane sensor, |
| 2,567,101                                       | 99 bp→21 bp | 1         | 1         | intergenic (-1/+1)      | AMA23_02494 ← / ← AMA23_02495 | tRNA-Lys/tRNA-Lys                                                                                  |
| 2,683,305                                       | C→T         | 1         | 1         | S80S (TCC→TCT)          | AMA23_02603 →                 | hypothetical protein                                                                               |
| 2,683,502                                       | A→T         | 1         | 1         | G19G (GGA→GGT)          | AMA23_02604 →                 | hypothetical protein                                                                               |
| 2,683,756                                       | A→G         | 1         | 1         | Q104R (CAA→CGA)         | AMA23_02604 →                 | hypothetical protein (IS66 transposase – TnpB)                                                     |
| 2,683,766                                       | A→G         | 1         | 1         | V107V (GTA→GTG)         | AMA23_02604 →                 | hypothetical protein                                                                               |
| 2,683,788                                       | T→C         | 1         | 1         | intergenic (+7/-68)     | AMA23_02604 → / → AMA23_02605 | hypothetical protein/hypothetical protein                                                          |
| 2,683,793                                       | G→C         | 1         | 1         | intergenic (+12/-63)    | AMA23_02604 → / → AMA23_02605 | hypothetical protein/hypothetical protein                                                          |
| 2,702,962                                       | G→A         | 1         | 0         | L88L (CTG→CTA)          | AMA23_02620 →                 | hypothetical protein                                                                               |
| 2,738,196                                       | T→C         | 1         | 1         | intergenic (-160/-608)  | AMA23_02655 ← / → rpoN        | IS481 family transposase ISNwi5/RNA polymerase sigma-54 factor                                     |
| 2,738,199                                       | A→T         | 1         | 0         | intergenic (-163/-605)  | AMA23_02655 ← / → rpoN        | IS481 family transposase ISNwi5/RNA polymerase sigma-54 factor                                     |
| 2,874,265                                       | T→C         | 1         | 1         | S22S (TCT→TCC)          | AMA23_02787 →                 | IS5 family transposase ISAb31                                                                      |
| 2,874,271                                       | T→C         | 1         | 1         | H24H (CAT→CAC)          | AMA23_02787 →                 | IS5 family transposase ISAb31                                                                      |



|           |                             |   |   |                          |                               |                                                                                                              |
|-----------|-----------------------------|---|---|--------------------------|-------------------------------|--------------------------------------------------------------------------------------------------------------|
| 2,874,283 | C→T                         | 1 | 1 | N28N (AAC→AAT)           | AMA23_02787→                  | IS5 family transposase ISAb31                                                                                |
| 2,874,289 | T→C                         | 1 | 1 | R30R (CGT→CGC)           | AMA23_02787→                  | IS5 family transposase ISAb31                                                                                |
| 2,874,661 | C→T                         | 1 | 1 | D154D (GAC→GAT)          | AMA23_02787→                  | IS5 family transposase ISAb31                                                                                |
| 2,874,682 | C→A                         | 1 | 1 | V161V (GTC→GTA)          | AMA23_02787→                  | IS5 family transposase ISAb31                                                                                |
| 2,874,730 | A→G                         | 1 | 1 | R177R (AGA→AGG)          | AMA23_02787→                  | IS5 family transposase ISAb31                                                                                |
| 2,874,742 | A→T                         | 1 | 1 | T181T (ACA→ACT)          | AMA23_02787→                  | IS5 family transposase ISAb31                                                                                |
| 2,874,765 | T→C                         | 1 | 1 | I189T (ATA→ACA)          | AMA23_02787→                  | IS5 family transposase ISAb31                                                                                |
| 2,982,998 | G→A                         | 1 | 1 | N16N (AAC→AAT)           | AMA23_02894←                  | IS3 family transposase ISAb14                                                                                |
| 3,011,593 | G→A                         | 1 | 1 | intergenic (-101/+216)   | <i>putP_2</i> ← /← <i>mpl</i> | Sodium/proline symporter/UDP-N-acetylmuramate--L-alanyl-gamma-D-glutamyl-meso-2,6-diaminoheptandioate ligase |
| 3,164,429 | G→A                         | 1 | 1 | intergenic (-549/-273)   | AMA23_03055← /→ <i>higB-2</i> | IS3 family transposase ISAcsp5/Toxin HigB-2                                                                  |
| 3,203,760 | Δ99 bp                      | 1 | 1 | intergenic (+1496/-1468) | AMA23_03098→ /→ AMA23_03099   | hypothetical protein/IS21 family transposase ISAb8                                                           |
| 3,203,859 | Δ99 bp                      | 1 | 1 | intergenic (+1595/-1369) | AMA23_03098→ /→ AMA23_03099   | hypothetical protein/IS21 family transposase ISAb8                                                           |
| 3,239,065 | 90 bp→60 bp                 | 0 | 1 | intergenic (+1/-484)     | AMA23_03137→ /→ AMA23_03138   | tRNA-Ala/IS3 family transposase ISAb18                                                                       |
| 3,239,318 | T→A                         | 1 | 1 | intergenic (+254/-320)   | AMA23_03137→ /→ AMA23_03138   | tRNA-Ala/IS3 family transposase ISAb18                                                                       |
| 3,239,327 | +T                          | 1 | 1 | intergenic (+263/-311)   | AMA23_03137→ /→ AMA23_03138   | tRNA-Ala/IS3 family transposase ISAb18                                                                       |
| 3,239,338 | T→C                         | 1 | 1 | intergenic (+274/-300)   | AMA23_03137→ /→ AMA23_03138   | tRNA-Ala/IS3 family transposase ISAb18                                                                       |
| 3,239,341 | G→A                         | 1 | 1 | intergenic (+277/-297)   | AMA23_03137→ /→ AMA23_03138   | tRNA-Ala/IS3 family transposase ISAb18                                                                       |
| 3,239,346 | C→G                         | 1 | 1 | intergenic (+282/-292)   | AMA23_03137→ /→ AMA23_03138   | tRNA-Ala/IS3 family transposase ISAb18                                                                       |
| 3,242,892 | +GTAAG<br>CCAATCT<br>AACGCT | 1 | 1 | coding (282/351 nt)      | AMA23_03145←                  | IS30 family transposase ISAb125                                                                              |

Variant calling was performed using breseq and gdttools software (Parameter: Default)

Reference sequence: *A. baumannii* AMA23\_1 without beta-lactam inhibitor

Table S6: Comparison of the level of expression of genes obtained by RT-qPCR in the AMA22 and AMA23 variants compared to the corresponding wild-type strains.

| Gene name                                                    | AMA22_1R<br>(Log <sub>2</sub> FC) | AMA23_4R<br>(4µg/ml)<br>(Log <sub>2</sub> FC) | AMA23_8R<br>(8µg/ml)<br>(Log <sub>2</sub> FC) |
|--------------------------------------------------------------|-----------------------------------|-----------------------------------------------|-----------------------------------------------|
| <b>Outer membrane proteins</b>                               |                                   |                                               |                                               |
| <i>ompA</i>                                                  | -3.56 (*)                         | -4.51                                         | -2.82                                         |
| <i>carO</i>                                                  | -2.79 (*)                         | -2.59                                         | -2.23                                         |
| <b>TonB-dependent receptors (TBDRs) and iron homeostasis</b> |                                   |                                               |                                               |
| <i>pirA</i>                                                  | -2.41 (*)                         | -0.29                                         | -0.65                                         |
| <i>bauA</i>                                                  | 2.67 (*)                          | 0.53                                          | -1.27                                         |
| <i>piuA</i>                                                  | 1.21 (*)                          | 0.29                                          | 3.06 (*)                                      |
| <i>ppiA</i>                                                  | -0.78 (*)                         | -0.11                                         | -0.08                                         |
| <b>Two-component system</b>                                  |                                   |                                               |                                               |
| <i>baeS</i>                                                  | 0.65 (*)                          | 0.10                                          | 1.32 (*)                                      |
| <i>baeR</i>                                                  | 0.73 (*)                          | -0.28                                         | -0.87                                         |
| <b>β-lactamase-encoding genes</b>                            |                                   |                                               |                                               |
| <i>bla<sub>ADC</sub></i>                                     | -2.78 (*)                         | -0.20                                         | 0.25                                          |
| <i>bla<sub>NDM-1</sub></i>                                   | -1.68 (*)                         | 1.14 (*)                                      | -1.59                                         |
| <b>Others</b>                                                |                                   |                                               |                                               |
| <i>pbp3</i>                                                  | -1.95 (*)                         | -0.30                                         | -0.80                                         |
| <b>Biofilms</b>                                              |                                   |                                               |                                               |
| <i>bfmS</i>                                                  | ND                                | 0.86                                          | 0.59                                          |
| <i>bfmR</i>                                                  | ND                                | 3.16 (*)                                      | 2.55 (*)                                      |

- Log<sub>2</sub>FC > 1
- Log<sub>2</sub>FC < - 1
- Log<sub>2</sub>FC (0-1)
- Log<sub>2</sub>FC (-1-0)

ND: not determined

(\*)  $p < 0.05$
